1 **Title**

2 **Haploinsufficiency of the mouse *Tshz3* gene leads to kidney dysfunction**

3 **Authors**

4 Irene Sanchez-Martin<sup>1</sup>, Pedro Magalhães<sup>2</sup>, Ahmed Fatmi<sup>1</sup>, Fabrice Richard<sup>1</sup>, Thien  
5 Phong Vu Manh<sup>3</sup>, Andy Saurin<sup>1</sup>, Guylène Feuillet<sup>4,5</sup>, Colette Denis<sup>4,5</sup>, Joost P.  
6 Schanstra<sup>4,5</sup>, Petra Zürbig<sup>2</sup>, Xavier Caubit<sup>1</sup>, Laurent Fasano<sup>1,\*</sup>

7 **Affiliation**

8 1 Aix Marseille Univ, CNRS, IBDM, UMR7288, Marseille, France

9 2 Mosaiques Diagnostics GmbH, Hannover, Germany.

10 3 Aix Marseille Univ, CNRS, INSERM, CIML, Centre d'Immunologie de Marseille-  
11 Luminy, Marseille, France.

12 4 Institut National de la Santé et de la Recherche Médicale (INSERM), U1297, Institut  
13 of Cardiovascular and Metabolic Disease, Toulouse, France.

14  
15 5 Université Toulouse III Paul-Sabatier, Toulouse, France.  
16

17 **\* Correspondence:**

18 Correspondence should be addressed to Laurent Fasano

19 [laurent.fasano@univ-amu.fr](mailto:laurent.fasano@univ-amu.fr)

20

21 **Abstract**

22 Renal tract defects and autism spectrum disorder (ASD) deficits represent the phenotypic  
23 core of the 19q12 deletion syndrome caused by the loss of one copy of the *TSHZ3* gene.  
24 While a proportion of *Tshz3* heterozygous (*Tshz3*<sup>+/*lacZ*</sup>) mice display ureteral defects, no  
25 kidney defects have been reported in these mice. The purpose of this study was to  
26 characterize the expression of *Tshz3* in adult kidney as well as the renal physiological  
27 consequences of embryonic haploinsufficiency of *Tshz3* by analyzing the morphology

28 and function of *Tshz3* heterozygous adult kidney. Here, we described *Tshz3* expression  
29 in the smooth muscle and stromal cells lining the renal pelvis, the papilla and glomerular  
30 endothelial cells (GEnCs) of the adult kidney. Histological analysis showed that  
31 *Tshz3<sup>+lacZ</sup>* adult kidney had an average of 29% fewer glomeruli than wild type kidney.  
32 Transmission electron microscopy (TEM) of *Tshz3<sup>+lacZ</sup>* glomeruli revealed  
33 ultrastructural defects. Compared to wild type, *Tshz3<sup>+lacZ</sup>* mice showed no difference in  
34 their urine parameters but lower blood urea, phosphates, magnesium and potassium at 2  
35 months of age. At the molecular level, transcriptome analysis identified differentially  
36 expressed genes related to inflammatory processes in *Tshz3<sup>+lacZ</sup>* compare to wild type  
37 (WT; control) adult kidneys. Lastly, analysis of the urinary peptidome revealed 33  
38 peptides associated with *Tshz3<sup>+lacZ</sup>* adult mice. These results provide the first evidence  
39 that in the mouse *Tshz3* haploinsufficiency leads to cellular, molecular and functional  
40 abnormalities in the adult mouse kidney.

## 41 **Introduction**

42 Congenital anomalies of the kidneys and urinary tract (CAKUT) are the most common  
43 cause of renal failure in children <sup>1</sup>. Ureteropelvic junction obstruction (UPJO), the most  
44 common paediatric renal obstructive disorder, has an incidence of 1 in 1000-1500 live  
45 births screened by antenatal ultrasound <sup>2</sup>. Congenital UPJO is usually caused by the  
46 presence of an aperistaltic segment of the ureter, preventing the efficient transport of the  
47 urine from the kidney to the bladder. UPJO can result from the decrease in the number of  
48 smooth muscle cells, interstitial Cajal-like cells and nerve fibers in the ureteropelvic  
49 junction. Therefore, impaired transport of urine can lead to an increase in back-pressure  
50 on the kidney, hydronephrosis, and progressive damage to the kidney function <sup>3</sup>.

51 The *TSHZ3* gene (Teashirt zinc-finger homeobox family member 3; also known as  
52 ZNF537), which encodes a zinc-finger transcription factor, was recently identified as the  
53 critical region for a 19q12 deletion syndrome (19q12DS): patients with *TSHZ3*  
54 heterozygous deletion show lower (i.e. vesicoureteral reflux grade 2) and upper (i.e.  
55 UPJO) urinary tract defects as well as kidney (i.e. hydronephrosis and nephrolithiasis)  
56 defects<sup>4</sup>.

57 *Tshz3* homozygous mutant mice (*Tshz3<sup>lacZ/lacZ</sup>*) have been used to explore the  
58 pathogenesis of *Tshz3* in UPJO <sup>5,6</sup>. Studies have shown that from embryonic day (E) 12.5  
59 onwards TSHZ3 positive cells are detected in the mouse ureter and the kidney <sup>5</sup>. In the

60 embryo, *Tshz3* plays a key role in smooth muscle differentiation by regulating *Myocardin*  
61 (*myocd*) expression and MYOCD activity<sup>5,6</sup>. *Tshz3<sup>lacZ/lacZ</sup>* mutant mice die perinatally  
62 because of their inability to breathe and display bilateral UPJO and hydronephrosis<sup>5,7</sup>. In  
63 comparison, one-fourth of *Tshz3<sup>+lacZ</sup>* heterozygous embryos display a unilateral UPJO  
64 and hydronephrosis and about 50% die at birth<sup>5-7</sup>. However, the impact of *Tshz3*  
65 haploinsufficiency on the postnatal kidneys has never been investigated so far.  
66 Therefore, the main aim of this study was to determine whether *Tshz3* heterozygote mice  
67 exhibit kidney defects in order to gain insights on whether haploinsufficiency may help  
68 explaining kidney diseases reported in patients with heterozygous deletion of *TSHZ3*.

69

## 70 **Results**

### 71 **TSHZ3 expression in adult kidneys.**

72 Previous analyses performed during development indicate that the temporal and spatial  
73 distribution of  $\beta$ -galactosidase ( $\beta$ -gal) protein in *Tshz3<sup>+lacZ</sup>* mice faithfully reproduces the  
74 expression of *Tshz3/TSHZ3*<sup>5,6</sup>. Here we used the same approach to characterize the  
75 expression of *Tshz3/TSHZ3* in sections of *Tshz3<sup>+lacZ</sup>* adult kidneys. X-Gal staining  
76 performed on *Tshz3<sup>+lacZ</sup>* adult kidney revealed that *Tshz3* is expressed in the pelvic region  
77 and ureter, the papilla, perivascular region and the glomeruli (**Fig. 1A-F**). To further  
78 characterize the expression of TSHZ3 in the glomeruli, we performed immunostaining,  
79 using glomerular cells markers. These analyses showed that  $\beta$ -gal positive cells were  
80 endothelial cell (CD31-positive) but not podocytes (Dachshund 1 positive) or mesangial  
81 cells (NG2 positive) (**Fig. 1G-I**). Double immunostaining for  $\beta$ -gal and Smooth muscle  
82 alpha-actin (SMAA) confirmed the expression of TSHZ3 in smooth muscle cells in the  
83 pelvic region and in SMA-negative Dachshund 1-positive stromal cells lining the  
84 urothelium (**Fig. 2**).

85

### 86 ***Tshz3<sup>+lacZ</sup>* mice showed glomerular defects.**

87 Comparison of 8-week-old adult kidney histology revealed a decrease of 28.8% in  
88 glomerular density in *Tshz3<sup>+lacZ</sup>* compared to WT (**Fig. 3A, B and supplementary Fig.**  
89 **4**). The same analysis performed with 40-week-old adult kidneys revealed a 44.2%  
90 reduction of glomerular density in *Tshz3<sup>+lacZ</sup>* vs. WT. In order to identify glomerular

91 morphological changes in *Tshz3*<sup>+/*lacZ*</sup> mice, we conducted an ultrastructural analysis using  
92 transmission electron microscopy (TEM). While this analysis did not identify a  
93 significant variation of the proportion of the size of the fenestration and endothelial layer  
94 (**Fig. 3C, D**), it revealed a significant reduction of the thickness of the glomerular  
95 basement membrane (GBM) in glomeruli of *Tshz3*<sup>+/*lacZ*</sup> mutants ( $144.2 \pm 4.2$  nm)  
96 compared to WT ( $155.1 \pm 3.32$  nm) (**Fig. 3E, F**). TEM analysis also showed a  
97 significantly increased foot process width ( $351.7 \pm 5.03$  nm) in *Tshz3*<sup>+/*lacZ*</sup> compared to  
98 WT ( $303.4 \pm 6.57$  nm) podocytes, suggesting foot process effacement (FPE) (**Fig. 3G,**  
99 **H**).

#### 100 **Blood electrolytes are modified in *Tshz3*<sup>+/*lacZ*</sup> mice.**

101 To characterize the effects of *Tshz3* haploinsufficiency on kidney filtration, we performed  
102 biochemical measurements on blood samples and generated biochemical profiles for  
103 *Tshz3*<sup>+/*lacZ*</sup> and WT adult mice tested at 58-64 days-of-age. While this analysis  
104 demonstrated that *Tshz3*<sup>+/*lacZ*</sup> mice had no proteinuria compared to WT, it showed a  
105 significant reduction of the urea ( $P < 0.013$ ), phosphates ( $P < 0.011$ ), magnesium ( $P < 0.014$ ),  
106 potassium ( $P < 0.0034$ ) as well as an increased concentration of sodium ( $P < 0.012$ ) (**Fig.**  
107 **4; Table 1a**). This analysis also suggested a trend for an increased concentration of  
108 creatinine in *Tshz3*<sup>+/*lacZ*</sup> compared to WT ( $15.91 \pm 1.51$  vs.  $12.36 \pm 2.07$   $\mu\text{m/l}$ ), but no  
109 statistical significance was observed.

#### 110 111 **The *Tshz3*<sup>+/*lacZ*</sup> adult kidney showed differential expression of genes involved in** 112 **inflammatory processes.**

113 To identify *Tshz3*-regulated genes in the adult kidney, RNA sequencing analysis was  
114 performed with samples extracted from *Tshz3*<sup>+/*lacZ*</sup> (n=6) and wild type (WT; controls,  
115 n=6) adult mouse kidneys. 97 differentially expressed genes (DEGs) were identified,

116 among which 55 were up-regulated and 42 were down-regulated (adjusted p-value <  
117 0.01) (**Table 1b**). Thereafter, we sought to take advantage of the single-cell  
118 transcriptome of mouse glomeruli <sup>8</sup> and adult kidney<sup>9</sup> to identify the cell types in wild  
119 type kidneys that expressed the genes differentially expressed in *Tshz3<sup>+lacZ</sup>* kidney.  
120 This analysis identified 58 genes expressed in podocytes, 31 in mesangial cells, 27 in  
121 immune cells, 40 in tubules and 43 in GECs, which might be direct targets of TSHZ3  
122 (**Table 1c**). We also found that some DEGs were shown to be markers of proximal  
123 tubules (*Aspdh*, *Snhg11* and *D630029K05Rik*, a long non-coding RNA) or myeloid  
124 lineage (*Cd74*, *Gusb*, *H2-Aa*, *H2-Ab1*, *Lyz2*, *Mpeg1* and *Vcam1*), including  
125 macrophages and dendritic cells <sup>10</sup>.

126 To characterize the differential expression data and to identify biological changes that  
127 occur in *Tshz3<sup>+lacZ</sup>* kidneys, we performed different enrichment analyses. As only a few  
128 genes showed very strong differential expression, we applied gene set enrichment  
129 analysis (GSEA <sup>11,12</sup>) using a ranked gene list. We chose the updated public genesets  
130 available on MSigDB <sup>12</sup> and identified positive enrichment in the kidneys of *Tshz3<sup>+lacZ</sup>*  
131 adult mice for gene sets related to “interferon-gamma response”, “epithelial to  
132 mesenchymal transition”, “inflammatory response” and negative enrichment for genes  
133 related to “Oxidative Phosphorylation” and “Xenobiotic Metabolism” (**Table 1d**;  
134 **Supplementary Fig. 1**). Furthermore, ingenuity pathway analysis (IPA) of the DEGs  
135 revealed enrichment of cellular processes centered on inflammatory and kidney diseases  
136 (**Supplementary Fig. 2A, B**). This analysis showed that the relevant toxicity phenotypes  
137 and pathology endpoints associated with the DEGs in *Tshz3<sup>+lacZ</sup>* mice were centered on  
138 the kidney and identified interferon-gamma (IFNG) as an upstream regulator  
139 (**Supplementary Fig. 2B, C**). Moreover, enrichment analysis of pathways and  
140 transcription factor using enrichR <sup>13</sup> also identified the “*interferon gamma*” pathway but

141 also “*collagen formation*” and “*extracellular matrix organization*” as significantly  
142 enriched in *Tshz3<sup>+lacZ</sup>* adult kidneys (**Table 1e**). Interestingly, the ChIP enrichment  
143 analysis (ChEA) and a database search revealed that 22 DEGs (21.68%) are direct targets  
144 of the transcription factor interferon regulatory factor 8 (IRF8) (**Table 1f**).

145 Using RT-qPCR we confirmed the DEG status observed by RNA-seq analysis for *Ciita*,  
146 *Pld4* (two targets of IRF8), *Tlr7* (IRF8 target that promotes IFNG production<sup>14</sup>) and the  
147 proinflammatory *Npy* (**Supplementary Fig. 3**).

148

#### 149 **Genes differentially expressed in *Tshz3<sup>+lacZ</sup>* adult kidney are associated with ASD**

150 To gain insights into *TSHZ3* function, we studied the disease association of the 80 non-  
151 ambiguous human orthologs of the mouse DEGs (**Table 1g**). This analysis identified  
152 35/80 genes (43.75%), which were established or putative causes for kidney disorders.  
153 Interestingly, 8 of these genes have been also associated with ASD (**Table 1h**).

154

#### 155 **Identification of *Tshz3<sup>+LacZ</sup>*-related urinary peptides**

156 Since *Tshz3<sup>+lacZ</sup>* mice exhibit dysregulated kidney expression of several genes and altered  
157 hematological parameters, we sought to analyze their urinary peptidome. Urine samples  
158 derived from *Tshz3<sup>+LacZ</sup>* (n=15) and WT (n=12) were analyzed by capillary  
159 electrophoresis coupled to mass spectrometry (CE-MS). Comparison of urinary  
160 peptidome profiles led to the identification of 33 peptides that were significantly (adjusted  
161 p-value < 0.05) associated with *Tshz3<sup>+lacZ</sup>* (**Fig. 5**). Protein fragments from clusterin  
162 (CLUS), complement factor D (CFAD), histone H2B type 1-F/J/L (H2B1F), major  
163 urinary protein 17 (MUP17), tripeptidyl-peptidase 1 (TPP1) and uromodulin (UMOD),  
164 as well as a large number (27) of collagen fragments, were identified (**Table 1i**).  
165 *Tshz3<sup>+lacZ</sup>* mice showed a decreased concentration of uromodulin and an increased  
166 concentration of peptides from clusterin, complement factor D, histone H2B type 1-F/J/L,

167 major urinary protein 17 as well as tripeptidyl-peptidase 1 fragments. Twelve collagen  
168 peptides were in higher abundance and fifteen in lower abundance. As UPJO can lead to  
169 significant kidney damage, we compared the identified 33 urinary peptides from mice  
170 with those of the CKD273 classifier, a predictive marker of chronic kidney disease (CKD)  
171 progression in humans<sup>15</sup>. This analysis identified 14 similar (orthologs) human peptides  
172 in the CKD273 classifier, most of which were collagen fragments (10 from collagen type  
173 I alpha-1 chain and 3 from type III alpha-1 chain). One peptide fragment was from  
174 uromodulin.

175

176

## 177 **Discussion**

178 Previously, we reported that in mice and humans, haploinsufficiency of *Tshz3/TSHZ3*  
179 results in hydronephrosis<sup>5,16</sup> and that individuals with *TSHZ3* heterozygous deletion are at  
180 risk to develop kidney diseases<sup>16</sup>. However, the expression of *Tshz3* in adult kidney and  
181 the morphology of *Tshz3* heterozygous adult kidney have not been investigated before.  
182 Herein, we characterized *TSHZ3* expression in the adult mouse kidney, in particular in  
183 glomeruli where *TSHZ3* is specifically expressed in endothelial cells (GENCs), which is  
184 supported by single-cell RNA sequencing analysis<sup>8</sup>. Using *Tshz3<sup>+LacZ</sup>* heterozygous  
185 mice, we have also uncovered a key role for the *TSHZ3* transcription factor in controlling  
186 the glomerular density and morphology. Notably, we showed that *Tshz3<sup>+LacZ</sup>* mice have  
187 abnormal blood electrolytes and identified *Tshz3<sup>+LacZ</sup>*-related urinary peptides. In  
188 addition, by coupling transcriptomics with *in silico* analysis, we showed that in kidneys  
189 from *Tshz3<sup>+LacZ</sup>* mice, the expression of genes associated with inflammatory processes  
190 and of renal- and ASD-associated was different from that in WT mice. Combined with  
191 our previous reports, our data suggest that the *Tshz3* heterozygous mice constitute a model  
192 that replicates many of the corresponding human disease phenotypes.

193 The GEnCs, together with the glomerular basement membrane (GBM) and the podocytes,  
194 constitute the glomerular filtration barrier (GFB), which selectively filtrates the plasma.  
195 The GBM derives from the fusion of the basement membranes of both GEnCs and  
196 podocytes, and in adult kidney, the GEnCs may contribute to the renewed biosynthesis  
197 of the GBM. Because abnormalities in each of the three constituents of the GFB can lead  
198 to proteinuria and kidney disease, TEM was used to assess fine structures of the GFB.  
199 While TEM analysis revealed no obvious structural phenotype in TSHZ3-expressing  
200 GEnCs, it provided evidence that *Tshz3* haploinsufficiency leads to GBM thinning and  
201 change in podocyte morphology evidenced by foot process effacement (FPE).  
202 Interestingly, individuals with a thin GBM have hematuria but minimal proteinuria <sup>17</sup> and,  
203 accordingly, we found that the thin GBM as well as the defects in the podocytes did not  
204 result in the development of proteinuria. In future research it would be interesting to  
205 investigate whether these defects are associated with hematuria. At present, the primary  
206 cause of the structural defects observed in the GBM and the podocytes remains unknown.  
207 However, since communication between intraglomerular cells is required for proper  
208 development and maintenance of the GFB <sup>18</sup>, GBM thinning and foot process effacement  
209 might be the direct or indirect consequences of an abnormal cross-talk between the  
210 TSHZ3-positive GEnCs and other glomerular cells. Furthermore, *Tshz3* may be  
211 transiently expressed in glomerular cell lineages. Nevertheless, the comparison of the  
212 urinary peptidome of *Tshz3*<sup>+/lacZ</sup> and WT adult led to the identification of 27 collagen and  
213 6 non-collagen peptides associated with *Tshz3*<sup>+/lacZ</sup> mice. Among the collagen fragments  
214 displaying a deregulation (e.g. 12 increased or 15 decreased), we identified thirteen  
215 collagen fragments that overlap the CKD273 classifier that might be indicative of the  
216 development of fibrosis <sup>19,20</sup>. As previously suggested <sup>21</sup>, the fragments overlapping the  
217 human CKD273 classifier could be used as biomarkers to assess renal function in patients



218 with *TSHZ3* heterozygous deletion. Interestingly, our analysis of urinary peptides also  
219 revealed an under-representation of a MUP17 peptide in *Tshz3<sup>+/-lacZ</sup>* mice. The MUP17  
220 protein is predominantly expressed in males and dominant males significantly increased  
221 the secretion of MUP17 in social conditions<sup>22,23</sup>. In the future, it would be interesting to  
222 study the relationship between variations in the level of MUP17 and the severity of the  
223 social behavior deficit observed in *Tshz3<sup>+/-lacZ</sup>* mice. To further evaluate renal function,  
224 we performed biochemical measurements on blood samples and generated biochemistry  
225 profiles. This analysis identified a significantly reduced concentration for urea,  
226 phosphates, magnesium and potassium in *Tshz3<sup>+/-lacZ</sup>* mice. Reduced serum urea is less  
227 frequent and usually of less clinical significance than increased serum urea<sup>24,25</sup>.  
228 Nevertheless, overhydration is one of the rare causes of decreased serum urea and we  
229 routinely observed that *Tshz3<sup>+/-lacZ</sup>* mice drink more and urinate more than WT mice (not  
230 shown). The lower plasma magnesium (hypomagnesaemia), phosphate  
231 (hypophosphatemia) and potassium (hypokalemia) serum concentration are associated  
232 with defective reabsorption/excretion process in the distal nephron<sup>26-28</sup>. Interestingly,  
233 single-cell transcriptional profiling of the healthy mouse kidney showed expression of  
234 *Tshz3* in the proximal tubule, distal convoluted tubule as well as in collecting duct  
235 principal and intercalated cells<sup>9</sup>, suggesting that *Tshz3* haploinsufficiency might impact  
236 different components of the nephron. In the future, these transcriptomic data should be  
237 complemented by a comparative analysis of the expression of TSHZ3 and segment-  
238 specific tubular markers in WT and *Tshz3<sup>+/-lacZ</sup>* adult kidneys. To identify pathways that  
239 might be altered, we performed RNA-seq analysis and detected 48 statistically significant  
240 changes in gene expression in adult kidneys of *Tshz3<sup>+/-lacZ</sup>* as compared to WT. Based on  
241 the results of enrichment analyses, we detected the involvement of inflammation-related  
242 pathways such as interferon-gamma. Of note, seven DEGs (*Crym*, *Ctss*, *Fasn*, *Fcgrt*,

243 *Gabrb3*, *Lyz2*, and *Vcam1*) were found to be associated with kidney diseases, including  
244 renal inflammation, crescentic glomerulonephritis or end-stage renal failure.  
245 Interestingly, population-based studies support that autism spectrum disorder (ASD) and  
246 kidney disease coexist in several genetic disorders (for review see Table 2 in <sup>29</sup>),  
247 suggesting that the same genetic modification can affect neurodevelopment and  
248 nephrogenesis. However, because the genetic alterations (deletion or duplication)  
249 associated with these disorders often encompass several genes, it is still unclear how these  
250 genes contribute to the underlying molecular mechanisms. In this context, the *TSHZ3*  
251 gene which associates ASD with a congenital kidney condition is quite unique<sup>4</sup> and our  
252 findings that heterozygous deletion of *Tshz3* alters some of the key functions performed  
253 by the kidneys might be relevant for patients with *TSHZ3* heterozygous deletion. Indeed,  
254 we previously reported heterozygous deletion of the *TSHZ3* gene in six patients with renal  
255 tract defects, including one with nephrolithiasis and a second one with postnatal  
256 echogenic kidney and low glomerular filtration rate (Table1 in <sup>4</sup>) who required renal  
257 transplant (Table 2 in <sup>30</sup>). These results might also provide to be of interest for cognitive  
258 defects link to *TSHZ3* haploinsufficiency. For now, the role of low plasma concentration  
259 of magnesium in ASD is still a matter of debate. While two studies did not find a  
260 statistically significant difference in levels of magnesium in children diagnosed ASD <sup>31,32</sup>,  
261 two other studies <sup>33,34</sup> demonstrated lower levels of magnesium in children diagnosed  
262 with ASD. So far, *Tshz3* mouse models have been shown to be quite analogous to the  
263 clinical problems (i.e. ASD-associated deficits, hydroureter and hydronephrosis) reported  
264 in patients with *TSHZ3* heterozygous conditions <sup>4,5</sup>. Our results generate new hypotheses  
265 that might lead to further understanding of the clinical problems and to a better diagnosis  
266 management of *TSHZ3* patients.  
267  
268

## 269 **Materials and methods**

270

### 271 **Mouse strain and genotype**

272 The *Tshz3*<sup>+/*LacZ*</sup> mouse line has been described previously<sup>5</sup>.

273

### 274 **Samples collection and RNAseq**

275 For RNA sequencing, *Tshz3*<sup>+/*LacZ*</sup> and wild-type mice kidneys were collected at 60 days-  
276 of-age. The mean values for body weight of the *Tshz3*<sup>+/*LacZ*</sup> and wild-type were 34.7± 3.9  
277 g (n=6) and 34.6 ± 6.5 g (n=6), respectively. Dissected kidneys were stored in RNAlater  
278 solution (Qiagen) and kept frozen at -80 °C until RNA extraction.

279 Total individual kidney RNA was extracted using anRNeasy Maxi kit75162  
280 Lot.260018727/ Lot.160012031 from Quiagen according to manufacturer's instructions.

281 The integrity of RNA was assessed using a chip-based capillary electrophoresis machine  
282 and RNA concentration determined using a full spectrum (220-750nm)  
283 spectrophotometer. The quality control of the RNA was additionally checked with RNA  
284 6000 Pico de Agilent Technologies, according to the manufacturer's instructions. To  
285 obtain two independent total RNA preparations from the two different conditions (wild  
286 type: WT1 & WT2; *Tshz3*<sup>+/*LacZ*</sup>: HET1 & HET2) we pooled RNA from 3 kidneys per  
287 group in the same proportion. The starting material (1µg Total mRNA, dissolved in  
288 RNase-, DNase- and protease-free molecular grade water) was sent to GATC (Eurofins)  
289 for sequencing (Genome Sequencer Illumina HiSeq).

290 Sequences (fastq format) were mapped to the mm10 version of the mouse genome to  
291 generate Sequence Alignment/Map (SAM/BAM) format. After normalization, analysis  
292 of differentially expressed genes (DEGs) was performed using both the Bioconductor  
293 (<http://www.bioconductor.org>) package DESeq/DESeq2 and the package edgeR.

294 This analysis generated differential expression lists with False Discovery Rates (FDRs),  
295 which are derived from p-values corrected for multiple testing using the Benjamini-  
296 Hochberg method. 6 files in total were generated: FDR 1%, 10% for both UCSC  
297 (transcripts) and ENSEMBL (genes).

298 EnrichR tool<sup>13</sup> was used to performed enrichment analysis with “pathways”, gene  
299 ontology biological processes (GOBP) and transcription factor (ChIP Enrichment  
300 Analysis, ChEA). Gene set enrichment analysis (GSEA) was performed using the  
301 software provided by the Broad Institute<sup>35,36</sup> with default parameters and a pre-ranked

302 gene list calculated based on the  $10 \log_{10}$  of the  $P$ -value from DESeq2 analysis  
303 multiplied by the sign of differential expression.

304

### 305 **mRNA extraction, cDNA synthesis and quantitative real-time PCR (RT-qPCR)**

306 Total RNA from adult kidneys of WT and *Tshz3<sup>+lacZ</sup>* mice was prepared using a RNeasy  
307 Maxi Kit (ref 75162 Qiagen™), and first-strand cDNA was synthesized using a Maxima  
308 First Strand cDNA Synthesis Kit with dsDNase (ThermoFisher Scientific™ ref K1671  
309 50). All samples from each experiment were reverse-transcribed at the same time, and  
310 real-time PCR was performed on a StepOne+ qPCR detection system (Applied  
311 Biosystems™) using Luminaris Color HiGreen High ROX qPCR Master Mix (Thermo  
312 Fisher Scientific™ ref K0362). RT-qPCR conditions were as follows: 40 cycles of 95 °C  
313 for 15 s and 60 °C for 60 s. Reactions were run in triplicate in three independent  
314 experiments. The geometric mean of the housekeeping gene GAPDH was used as an  
315 internal control to normalize variability in expression levels, and samples were also  
316 normalized to their respective control group. Specificity of reactions was verified by melt  
317 curve analysis. Primer sequences used for Sybr qPCR are as follows:

318

|   | gene         | Primer FW               | Primer Rev              |
|---|--------------|-------------------------|-------------------------|
| 1 | <i>Gbp4</i>  | CAGGCTCTACATGGACATGAGG  | TGCCTGCAAGATGGAACCTCTCG |
| 2 | <i>Ciita</i> | ACCTTCGTCAGACTGGCGTTGA  | GCCATTGTATCACTCAAGGAGGC |
| 3 | <i>Tlr7</i>  | GTGATGCTGTGTGGTTTGTCTGG | CCTTTGTGTGCTCCTGGACCTA  |
| 4 | <i>Npy</i>   | TACTCCGCTCTGCGACTACTACA | GGCGTTTTCTGTGCTTTCCTTCA |
| 5 | <i>Gapdh</i> | GTCTCCTGCGACTTCAACAGCA  | ACCACCCTGTTGCTGTAGCCGT  |

319

320 Expression data were normalized to controls and the variability in expression levels was  
321 analyzed using the  $2^{-\Delta\Delta CT}$  method described Livak and Schmittgen<sup>37</sup>.

322 Variables which showed a p-value less than 0.05 in the resulting model were considered  
323 to have a significant effect. These statistical analyses were performed by unpaired t-tests  
324 with the qbase+ software version 2 (Biogazelle).

325

### 326 **Immunological and in situ hybridization analysis**

327 Adult mice were transcardially perfused with phosphate-buffered saline (PBS, 10 mM,  
328 pH 7.4), followed by 4% paraformaldehyde (PFA) in PBS under ketamine (150 mg/kg)  
329 and xylazine (20 mg/kg) anesthesia. Kidneys were post-fixed in 4% paraformaldehyde

330 (PFA; EMS Lot.160401) for 2 h at 4 °C, cryoprotected with 30% sucrose solution in PBS  
331 and frozen (Iso-Pentane RPE524391 Carlo Erba at dry ice temperature). Immunostaining  
332 was performed on 12- $\mu$ m cryosections from tissues embedded in OCT compound.  
333 Cryosections were washed with 0.2% Tween/PBS for 15 min and then blocked in 10%  
334 goat serum 0.1%/0.1% Tween/PBS for 1 h. Sections were incubated with primary  
335 antibodies overnight at 4 °C. Secondary antibodies were incubated 2 h at room  
336 temperature, and after several washes, sections were counterstained with DAPI for 10  
337 minutes.

338 The following primary antibodies were used: anti- $\beta$ -galactosidase (chicken, 1/1000,  
339 ab9361, Abcam; rabbit, 1/1000, Cappel), mouse anti-NG2 (1/100, MAB5384 Millipore),  
340 rabbit anti-CD31/Pecam (1/100 MEC13.3, BD Pharmingen) and rabbit anti-DACH11  
341 (1/100, Proteintech 10914-1-AP). Secondary antibodies: Alexa-Fluor-546 goat anti-  
342 mouse; Alexa-Fluor-546 donkey anti-rabbit, Alexa-Fluor 488 donkey anti-mouse, Alexa-  
343 Fluor-488 donkey anti-chicken. Slides were mounted with Fluoromount-G, Southern  
344 Biotech Lot: B0216-N156. Images were acquired using a laser scanning confocal  
345 microscope (LSM780; Carl Zeiss) and processed using Adobe Photoshop.

346 For X-gal staining, kidneys/ureters were dissected from non-perfused animals, kidneys  
347 were cut in two according to the sagittal plane, and tissues were fixed for 1 h in 1% PFA.  
348 Detection of  $\beta$ -galactosidase activity was done on tissues or on 14- $\mu$ m cryostat sections  
349 incubated in the dark in staining solution at 37 °C. X-gal staining was performed as  
350 described<sup>38</sup>.

351 Samples were paraffinized after washing in increasing alcohol concentrations (70%, 80%,  
352 90%, 97% and 100%) VWR chemicals for one day and finally with Xylene 33817  
353 (Sigma-Aldrich) for 2 h, and immersed in paraffin Paraplast X-TRA from Sigma at 65  
354 °C. Staining was performed with Hematoxylin (HHS32-1L Lot. 064K4354 Sigma-  
355 Aldrich), Eosin (Ht110230-1L Sigma-Aldrich), Trichrome Masson (Lot.17301-V04 Ral  
356 Diagnostics).

357

### 358 **Transmission electronic microscopy and quantification**

359 Kidneys were perfused as described above, rapidly dissected and postfixed in 2% PFA,  
360 2.5% glutaraldehyde in cacodylate buffer (pH 7.2) overnight at 4 °C. The kidneys were  
361 put in 1% OsO<sub>4</sub> solution in cacodylate buffer for 1 h on ice, then dehydrated on ice and

362 embedded in resin (EPON 912). Sample were polymerized 48 h at 60 °C. Ultrathin  
363 sections (80-nm) performed on Leica UCT were poststained with 2% uranyl acetate,  
364 followed by Reynolds' lead citrate. Section were examined with a high-resolution  
365 transmission electron microscope (Tecnai G2 (FEI), Netherland) at 200 kV and images  
366 were acquired with a Veleta camera (Olympus). EM images were opened and analyzed  
367 with ImageJ software <sup>39</sup>; the straight-line tool was used to measure GBM thickness and  
368 endothelial cell fenestration on randomly selected electron micrographs. The same  
369 approach was used for morphometric analysis of foot process effacement, as described  
370 previously <sup>40,41</sup>.

371

### 372 **Blood samples**

373 Blood samples were collected from *Tshz3<sup>+/-LacZ</sup>* (n= 11; 5 females and 6 males) and WT  
374 mice (n=11; 6 females and 5 males) at 60 days-of-age. The mean values for body weight  
375 of *Tshz3<sup>+/-LacZ</sup>* and wild-type were 38.27± 7.8 (n=11) and 33.01 ± 4.9 (n=11). Mice were  
376 anaesthetized by an intraperitoneal injection of ketamine/xylazine (0.1 ml/10 g body  
377 weight) prior to manipulation. Anesthesia was maintained by using 1.7% to 2.5%  
378 isoflurane delivered in 600 ml/min oxygen and a closely fitting facemask. Blood was  
379 collected by cardiocentesis puncture in heparinized tubes with EDTA and also in tubes  
380 without anticoagulant, centrifuging at 4 °C immediately after extraction. The total blood  
381 volume in 30-40 g mice is approximately 2 to 3 ml. The maximum volume that could be  
382 collected safely at a single survival time point was approximately 800-1000 µl. Blood  
383 tests were outsourced to Laboklin G.m.b.H. and performed using a Siemens' high-volume  
384 hematology analyzer (ADVIA 2120i) and a Roche' chemistry analyzer (Cobas 8000  
385 c701).

386

### 387 **Urine samples**

388 Urine samples were collected from *Tshz3<sup>+/-LacZ</sup>* (n= 7; 4 females and 3 males) and WT  
389 mice (n=7; 6 females and 1 males) at 60 days-of-age.

390 Animals were placed in a clean, dry, empty, and transparent individual cage. A non-  
391 absorbable plastic, fully sanitizable material was laid on the floor of the cage. During  
392 urine collection, water bottles were provided but no food was given to limit contamination  
393 with faeces or animal feed. The mouse was monitored all time and removed as soon as it  
394 urinated. The voided urine was aspirated with a Gilson Pipetman and transferred to a 1.5  
395 mL sterile microcentrifuge tube (kept on ice). Collected urine was stored at -80C prior to

396 analysis. Due to the small amount of urine collected, the procedure was repeated during  
397 three consecutive days to obtain 300ul of urine for each mouse.

398

### 399 **Urinary Proteomics**

400 *Sample Preparation:* Urine samples were collected and frozen at -80°C as described  
401 above. Immediately before preparation, mice urine samples were thawed on ice. 150 µl  
402 of urine was mixed with a similar volume of a solution containing 2 M urea, 10 mM  
403 NH<sub>4</sub>OH, and 0.02% sodium dodecyl sulfate (SDS). To remove high molecular weight  
404 molecules, samples were ultrafiltrated (3,400 × g for 45 min at 4°C) using a Centriscart  
405 20kDa cut-off centrifugal filter device (Satorius, Göttingen, Germany) until 200 µl of  
406 filtrate was obtained. Afterwards, the filtrate was desalted by a NAP5 gel filtration  
407 column (GE Healthcare BioSciences, Uppsala, Sweden) to eliminate electrolytes and  
408 urea, hence decreasing matrix effects. The samples were lyophilized in a Savant  
409 SpeedVac SVC100H connected to a Virtis 3L Sentry freeze dryer (Fischer Scientific,  
410 Illkirch, France), consequently stored at 4°C. Shortly before CE-MS analysis, the samples  
411 were resuspended in 10 µl high-performance liquid chromatography grade water (HPLC-  
412 H<sub>2</sub>O).

413 *CE-MS analysis and data processing:* CE-MS experiments were conducted as previously  
414 reported<sup>42</sup>. Briefly, a Beckman Coulter Proteome Lab PA800 capillary electrophoresis  
415 system (Fullerton, CA) online coupled to a micrOTOF II MS (Bruker Daltonic, Bremen,  
416 Germany) was used. The electro-ionization (ESI) sprayer (Agilent Technologies, Palo  
417 Alto, CA) was grounded, and the ion spray interface potential was established to -4.5 kV.  
418 Subsequently, data acquisition and MS acquisition methods were automatically measured  
419 through the CE by contact-close-relays. Spectra were accrued every 3 seconds, over a  
420 range of m/z 350 to 3000.

421 Mass spectral ion peaks signifying identical molecules at different charges were  
422 deconvoluted into singles masses using MosaiquesVisu<sup>43</sup>. The subsequent peak lists  
423 categorized each peptide according to its molecular mass (kDa), CE-migration time (min)  
424 and signal intensity (amplitude). Due to the analytical variances of urine samples,  
425 migration time and ion signal intensity (amplitude) were normalized using endogenous  
426 “housekeeping” peptides, normally displaying a small difference between at least 90% of  
427 all urine samples, as reported elsewhere<sup>42</sup>. Lastly, all detected peptides were deposited,  
428 matched and annotated in a Microsoft SQL database<sup>42</sup>. Thus, further comparisons and  
429 statistical analysis among both groups were performed.

430 *Sequencing of peptides:* Tandem mass spectrometry (MS/MS) analysis were conducted  
431 to retrieve the sequence information of the peptides, as previously described<sup>42</sup>. Briefly,  
432 MS/MS experiments were performed on a Dionex Ultimate 3000 RSLC nanoflow system  
433 (Dionex, Camberly, UK) coupled to an Orbitrap Velos MS instrument (Thermo Fisher  
434 Scientific). Thereafter, all resulting data files were evaluated by the use of SEQUEST  
435 (using Thermo Proteome Discoverer 1.2) without any enzyme specificity and searched  
436 beside the Swiss-Prot *Mus Musculus* database, as previously described<sup>44</sup>.

437 *Statistical analysis:* For the identification of potential significant different urinary  
438 peptides, urine samples from both groups (wild type and *Tshz3<sup>+/-lacZ</sup>*) were compared. *P*-  
439 values were calculated according to the Wilcoxon Rank-Sum test. For multiple testing  
440 correction, the reported *p*-values were further adjusted via false discovery rate method  
441 described by Benjamini and Hochberg<sup>45</sup>. Only peptides with *p*-values less than 0.05 and  
442 detected in a frequency threshold of  $\geq 70\%$  in at least one of both groups were further  
443 considered as statistically significant. Statistical analysis was performed using Prism 7.05  
444 (GraphPad Software, USA) and results considered significant at  $P < 0.05$ .

445

#### 446 **Data availability**

447 The data that support the findings of this study are available from the corresponding  
448 author upon reasonable request. Raw data (FastQ files) from the sequencing experiment  
449 (triplicates from wild-type and *Tshz3<sup>+/-lacZ</sup>* adult kidney) and raw abundance  
450 measurements for genes (read counts) for each sample are available from Gene  
451 Expression Omnibus (GEO) under accession GSE182010, which should be quoted in any  
452 manuscript discussing the data.

453

#### 454 **Ethics Statement**

455 The animal study was reviewed and approved by “*Comité National de Réflexion Ethique*  
456 *sur l'Expérimentation Animale 14*” (ID numbers 57-07112012) and were in agreement  
457 with the European Communities Council Directive (2010/63/EU).

458

#### 459 **Acknowledgements**

460 We appreciate feedback on the manuscript provided by Pierre L. Roubertoux and Adrian  
461 S. Woolf. Microscopy was performed at the imaging platform of the IBDM, supported  
462 by the ANR through the "Investments for the Future" program (France-BioImaging,  
463 ANR-10-INSB-04-01).



464

465 **Funding**

466 This work was supported by the European Union's Horizon 2020 research and innovation  
467 programme under the Marie Skłodowska-Curie grant agreement No 642937 (Scientific  
468 coordinator L.F), the French National Research Agency (ANR-17-CE16-0030-01  
469 "TSHZ3inASD" project to L.F.), the Centre National de la Recherche Scientifique  
470 (CNRS), the Institut National pour la Recherche Médicale (INSERM) and Aix-Marseille  
471 University. I.S-M. and P.M. acknowledge financial support from the European Union's  
472 Horizon 2020 research and innovation PhD programme under the Marie Skłodowska-  
473 Curie grant agreement No 642937.

474

475 **Competing Financial Interests**

476 The authors declare no competing financial interests or potential conflicts of interest.

477

478 **References**

479

- 480 1. Schedl, A. Renal abnormalities and their developmental origin. *Nat Rev Genet* **8**,  
481 791-802 (2007).
- 482 2. Chang, C.P. *et al.* Calcineurin is required in urinary tract mesenchyme for the  
483 development of the pyeloureteral peristaltic machinery. *J Clin Invest* **113**, 1051-  
484 8 (2004).
- 485 3. Klein, J. *et al.* Congenital ureteropelvic junction obstruction: human disease and  
486 animal models. *International Journal of Experimental Pathology* **92**, 168-92  
487 (2011).
- 488 4. Caubit, X. *et al.* TSHZ3 deletion causes an autism syndrome and defects in  
489 cortical projection neurons. *Nat Genet* **48**, 1359-1369 (2016).
- 490 5. Caubit, X. *et al.* Teashirt 3 is necessary for ureteral smooth muscle  
491 differentiation downstream of SHH and BMP4. *Development* **135**, 3301-10  
492 (2008).
- 493 6. Martin, E. *et al.* TSHZ3 and SOX9 regulate the timing of smooth muscle cell  
494 differentiation in the ureter by reducing myocardin activity. *PLoS One* **8**, e63721  
495 (2013).
- 496 7. Caubit, X. *et al.* Teashirt 3 regulates development of neurons involved in both  
497 respiratory rhythm and airflow control. *J Neurosci* **30**, 9465-76 (2010).
- 498 8. Karaiskos, N. *et al.* A Single-Cell Transcriptome Atlas of the Mouse  
499 Glomerulus. *Journal of the American Society of Nephrology : JASN* **29**, 2060-  
500 2068 (2018).
- 501 9. Park, J. *et al.* Single-cell transcriptomics of the mouse kidney reveals potential  
502 cellular targets of kidney disease. *Science* **360**, 758-763 (2018).
- 503 10. Liu, J. *et al.* Cell-specific translational profiling in acute kidney injury. *The*  
504 *Journal of clinical investigation* **124**, 1242-54 (2014).
- 505 11. Mootha, V.K. *et al.* PGC-1alpha-responsive genes involved in oxidative  
506 phosphorylation are coordinately downregulated in human diabetes. *Nature*  
507 *Genetics* **34**, 267-73 (2003).
- 508 12. Subramanian, A. *et al.* Gene set enrichment analysis: a knowledge-based  
509 approach for interpreting genome-wide expression profiles. *Proceedings of the*  
510 *National Academy of Sciences of the United States of America* **102**, 15545-50  
511 (2005).
- 512 13. Chen, E.Y. *et al.* Enrichr: interactive and collaborative HTML5 gene list  
513 enrichment analysis tool. *BMC Bioinformatics* **14**, 128 (2013).
- 514 14. Rubtsova, K., Rubtsov, A.V., van Dyk, L.F., Kappler, J.W. & Marrack, P. T-box  
515 transcription factor T-bet, a key player in a unique type of B-cell activation  
516 essential for effective viral clearance. *Proceedings of the National Academy of*  
517 *Sciences of the United States of America* **110**, E3216-24 (2013).
- 518 15. Good, D.M. *et al.* Naturally occurring human urinary peptides for use in  
519 diagnosis of chronic kidney disease. *Mol Cell Proteomics* **9**, 2424-37 (2010).
- 520 16. Caubit, X. *et al.* TSHZ3 deletion causes an autism syndrome and defects in  
521 cortical projection neurons. *Nature Genetics* **48**, 1359-1369 (2016).
- 522 17. Savage, J. *et al.* Thin basement membrane nephropathy. *Kidney Int* **64**, 1169-78  
523 (2003).
- 524 18. Dimke, H., Maezawa, Y. & Quaggin, S.E. Crosstalk in glomerular injury and  
525 repair. *Curr Opin Nephrol Hypertens* **24**, 231-8 (2015).
- 526 19. Magalhaes, P. *et al.* Association of kidney fibrosis with urinary peptides: a path  
527 towards non-invasive liquid biopsies? *Sci Rep* **7**, 16915 (2017).

- 528 20. Wei, R. *et al.* Alterations in urinary collagen peptides in lupus nephritis subjects  
529 correlate with renal dysfunction and renal histopathology. *Nephrol Dial*  
530 *Transplant* **32**, 1468-1477 (2017).
- 531 21. Klein, J. *et al.* Urinary peptidomics provides a noninvasive humanized readout  
532 of diabetic nephropathy in mice. *Kidney Int* **90**, 1045-1055 (2016).
- 533 22. Mudge, J.M. *et al.* Dynamic instability of the major urinary protein gene family  
534 revealed by genomic and phenotypic comparisons between C57 and 129 strain  
535 mice. *Genome Biol* **9**, R91 (2008).
- 536 23. Thoss, M. *et al.* Regulation of volatile and non-volatile pheromone attractants  
537 depends upon male social status. *Sci Rep* **9**, 489 (2019).
- 538 24. Gallagher, J.C. & Seligson, D. Significance of abnormally low blood urea  
539 levels. *N Engl J Med* **266**, 492-5 (1962).
- 540 25. Lum, G. & Leal-Khoury, S. Significance of low serum urea nitrogen  
541 concentrations. *Clin Chem* **35**, 639-40 (1989).
- 542 26. de Baaij, J.H., Hoenderop, J.G. & Bindels, R.J. Regulation of magnesium  
543 balance: lessons learned from human genetic disease. *Clin Kidney J* **5**, i15-i24  
544 (2012).
- 545 27. Liu, S. & Quarles, L.D. How fibroblast growth factor 23 works. *J Am Soc*  
546 *Nephrol* **18**, 1637-47 (2007).
- 547 28. Lederer, E. Regulation of serum phosphate. *J Physiol* **592**, 3985-95 (2014).
- 548 29. Clothier, J. & Absoud, M. Autism spectrum disorder and kidney disease. *Pediatr*  
549 *Nephrol* (2020).
- 550 30. Meyer, E. *et al.* Mutations in the histone methyltransferase gene KMT2B cause  
551 complex early-onset dystonia. *Nat Genet* **49**, 223-237 (2017).
- 552 31. Wu, L.L., Mao, S.S., Lin, X., Yang, R.W. & Zhu, Z.W. Evaluation of Whole  
553 Blood Trace Element Levels in Chinese Children with Autism Spectrum  
554 Disorder. *Biol Trace Elem Res* **191**, 269-275 (2019).
- 555 32. Saldanha Tschinkel, P.F., Bjorklund, G., Conon, L.Z.Z., Chirumbolo, S. &  
556 Nascimento, V.A. Plasma concentrations of the trace elements copper, zinc and  
557 selenium in Brazilian children with autism spectrum disorder. *Biomed*  
558 *Pharmacother* **106**, 605-609 (2018).
- 559 33. Strambi, M. *et al.* Magnesium profile in autism. *Biol Trace Elem Res* **109**, 97-  
560 104 (2006).
- 561 34. Guo, M. *et al.* Vitamin and mineral status of children with autism spectrum  
562 disorder in Hainan Province of China: associations with symptoms. *Nutr*  
563 *Neurosci* **23**, 803-810 (2020).
- 564 35. Subramanian, A. *et al.* Gene set enrichment analysis: a knowledge-based  
565 approach for interpreting genome-wide expression profiles. *Proc Natl Acad Sci*  
566 *U S A* **102**, 15545-50 (2005).
- 567 36. Mootha, V.K. *et al.* PGC-1 $\alpha$ -responsive genes involved in oxidative  
568 phosphorylation are coordinately downregulated in human diabetes. *Nat Genet*  
569 **34**, 267-73 (2003).
- 570 37. Livak, K.J. & Schmittgen, T.D. Analysis of relative gene expression data using  
571 real-time quantitative PCR and the 2<sup>-</sup>( $\Delta\Delta C_T$ ) Method. *Methods* **25**,  
572 402-8 (2001).
- 573 38. Relaix, F., Rocancourt, D., Mansouri, A. & Buckingham, M. Divergent  
574 functions of murine Pax3 and Pax7 in limb muscle development. *Genes Dev* **18**,  
575 1088-105 (2004).
- 576 39. Schneider, C.A., Rasband, W.S. & Eliceiri, K.W. NIH Image to ImageJ: 25  
577 years of image analysis. *Nature methods* **9**, 671-5 (2012).

- 578 40. van den Berg, J.G., van den Bergh Weerman, M.A., Assmann, K.J., Weening,  
579 J.J. & Florquin, S. Podocyte foot process effacement is not correlated with the  
580 level of proteinuria in human glomerulopathies. *Kidney Int* **66**, 1901-6 (2004).
- 581 41. Deegens, J.K. *et al.* Podocyte foot process effacement as a diagnostic tool in  
582 focal segmental glomerulosclerosis. *Kidney Int* **74**, 1568-76 (2008).
- 583 42. von zur Muhlen, C. *et al.* Urine proteome analysis reflects atherosclerotic  
584 disease in an ApoE<sup>-/-</sup> mouse model and allows the discovery of new candidate  
585 biomarkers in mouse and human atherosclerosis. *Molecular & cellular*  
586 *proteomics : MCP* **11**, M111 013847 (2012).
- 587 43. Neuhoff, N. *et al.* Mass spectrometry for the detection of differentially  
588 expressed proteins: a comparison of surface-enhanced laser  
589 desorption/ionization and capillary electrophoresis/mass spectrometry. *Rapid*  
590 *communications in mass spectrometry : RCM* **18**, 149-56 (2004).
- 591 44. Nkuipou-Kenfack, E. *et al.* The use of urinary proteomics in the assessment of  
592 suitability of mouse models for ageing. *PLoS One* **12**, e0166875 (2017).
- 593 45. Benjamini, Y. & Hochberg, Y. Controlling the False Discovery Rate: A  
594 Practical and Powerful Approach to Multiple Testing. *Journal of the Royal*  
595 *Statistical Society. Series B (Methodological)* **57**, 289-300 (1995).
- 596  
597

## 1 Figures

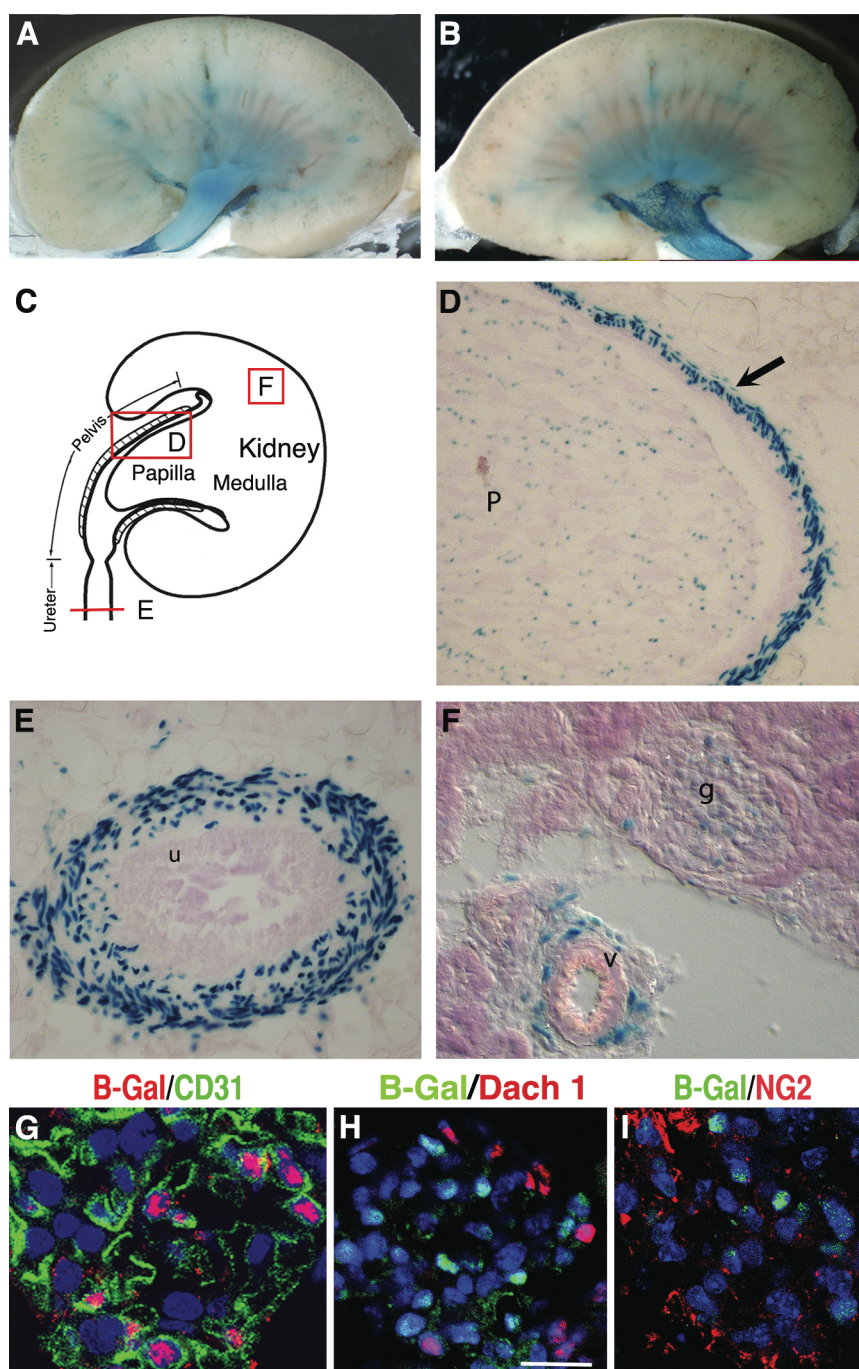

2

3 **Figure 1. Distribution of Xgal-positive cells in *Tshz3*<sup>+/lacZ</sup> adult renal tract.** (A, B) The two  
4 halves of the same adult kidney stained with X-Gal. (C) Cartoon showing the section sites and  
5 planes for D, E and F. (D-F) Xgal-Positive cells were found in papilla (p) and smooth muscle  
6 present in the pelvic region (arrow) (D), in the mesenchymal part of the ureter (E), in the  
7 glomeruli (g) and in close proximity to blood vessel (v) (F). (G-I) In glomeruli, TSHZ3 (β-Gal)  
8 is detected in CD31+ glomerular endothelial cells (G) but not in DACH1+ podocytes (H) or in  
9 NG2+ mesangial cells (I); scale bar, in G-I, 20 μm. B-Gal, Beta-Galactosidase; u: urothelium.

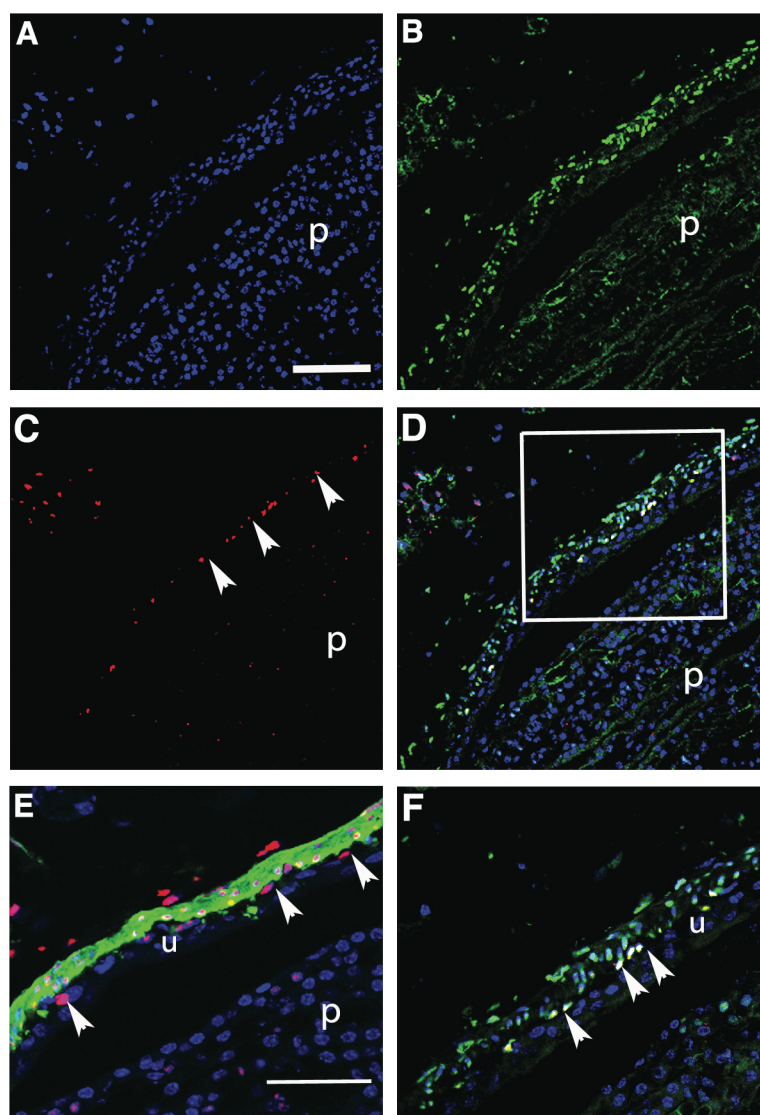

10

11 **Figure 2. Characterization of  $\beta$ -galactosidase-positive cells in the pelvic region of**  
12 ***Tshz3<sup>+lacZ</sup>* adult kidney.** (A-D) Comparative expression of  $\beta$ -galactosidase (green) and  
13 Dachshund 1 (red) in the pelvic region. (F) Close up of the region boxed in D. Merge image  
14 (D, F) shows that a subset of  $\beta$ gal+ cells expresses DACH1 (arrowheads in C and F). These  
15 cells represent a cell layer in a sub urothelial position. (E) Double immunostaining for  
16  $\beta$ galactosidase (red) and smooth muscle actin (green) indicates that  $\beta$ gal expression is found in  
17 SMA expressing cells. Some  $\beta$ gal+ cells adjacent to the urothelium do not express SMA  
18 (arrowheads in E). P: papilla, u: urothelium. Scale bars, in A, 100 $\mu$ m; in E, 50 $\mu$ m.

19

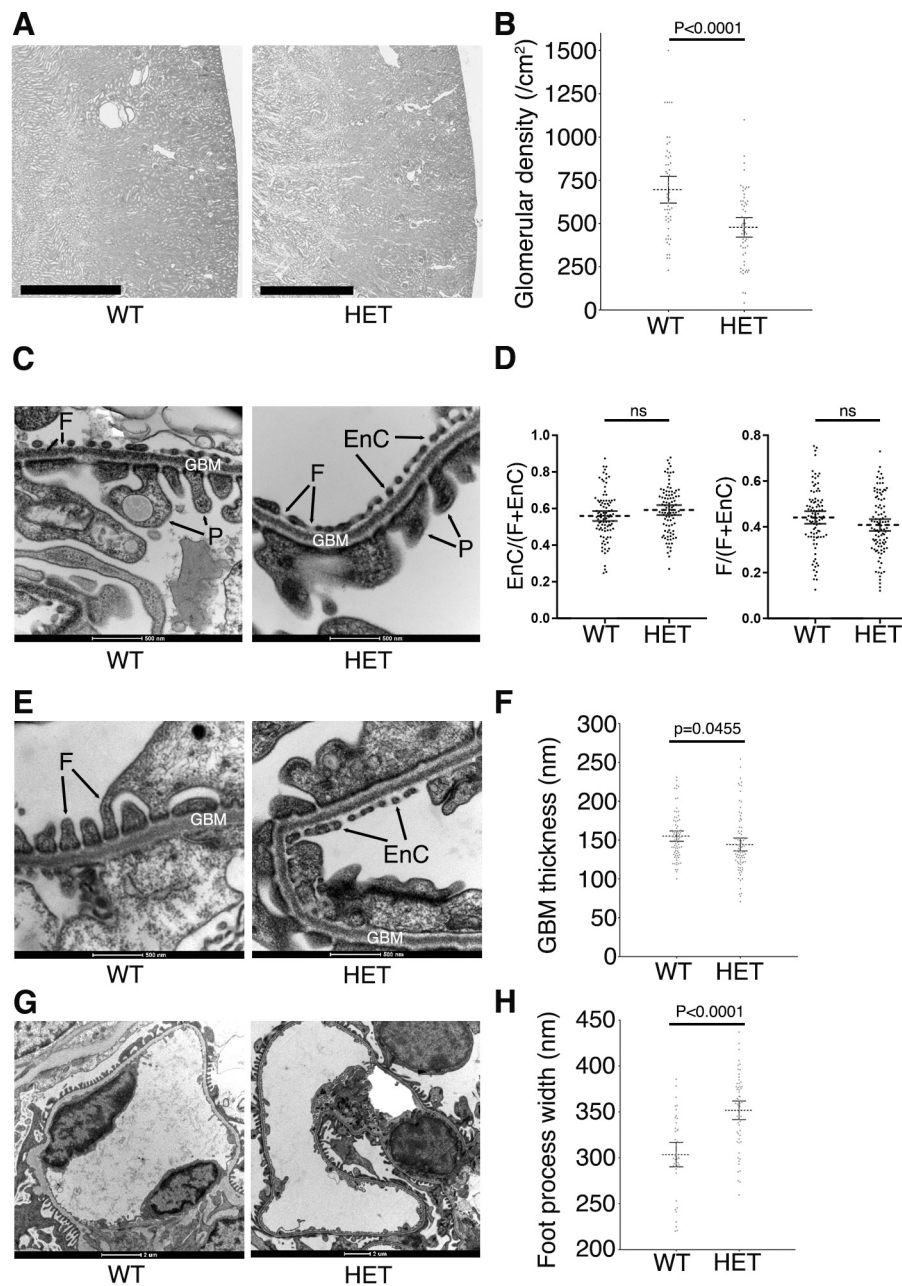

20

21 **Figure 3: Reduced glomerular density, glomerular basement membrane thinning and foot**  
22 **process effacement in heterozygous *Tshz3*<sup>lacZ/+</sup> mice.** (A) Representative images of  
23 haematoxylin and eosin-stained sections of WT and *Tshz3*<sup>+/*lacZ*</sup> adult kidneys at post-natal day  
24 60. Scale bar 1mm. (B) The graph shows the significant (P<0.0001) reduction of the glomerular  
25 density in heterozygous *Tshz3*<sup>lacZ/+</sup> ( $471 \pm 0.29$  /cm<sup>2</sup>, 48 sections from 3 kidneys) compare to  
26 wild-type kidney ( $695 \pm 0.38$  /cm<sup>2</sup>, 41 sections from 3 kidneys). (C, E, G) Representative TEM  
27 images of wild type and *Tshz3*<sup>+/*lacZ*</sup> adult kidneys. (D, F, H) TEM morphometric analysis. (C)  
28 TEM: No abnormalities in endothelial cell fenestration are observe in *Tshz3*<sup>+/*lacZ*</sup> mice. Scale  
29 bar, 500nm. (D) Morphometric analysis of the fenestration reveals no significant difference  
30 between WT and *Tshz3*<sup>+/*lacZ*</sup> mice. (E) TEM: *Tshz3*<sup>+/*lacZ*</sup> kidney shows a reduction of the

31 thickness of the GBM in *Tshz3<sup>lacZ/+</sup>* compared to WT. Scale bar, 500nm. (F) Morphometric  
32 analysis reveals a significant reduction ( $P < 0.0455$ ) of the thickness of the GBM in *Tshz3<sup>lacZ/+</sup>*  
33 ( $144.2 \pm 4.2$  nm, 84 sections from 3 kidneys) compare to wild-type ( $155.1 \pm 3.32$  nm, 78  
34 sections from 3 kidneys). (G) TEM: illustrating increased foot process effacement in *Tshz3<sup>lacZ/+</sup>*  
35 compared to WT mice. Scale bar,  $2\mu\text{m}$ . (H) Foot process width in WT ( $303.4 \pm 6.57$  nm, 42  
36 sections from 7 kidneys) is significantly lower ( $P < 0.0001$ ) compared to *Tshz3<sup>lacZ/+</sup>* ( $351.7 \pm$   
37  $5.03$  nm, 61 sections from 9 kidneys) mice. Data are shown as mean and its 95% CI. EnC,  
38 endothelial cell cytoplasm; F, endothelial fenestration; GBM, glomerular basement membrane;  
39 HET, hererozygous; P, podocyte foot process; SD, standard deviation; WT, wild type.

40

41



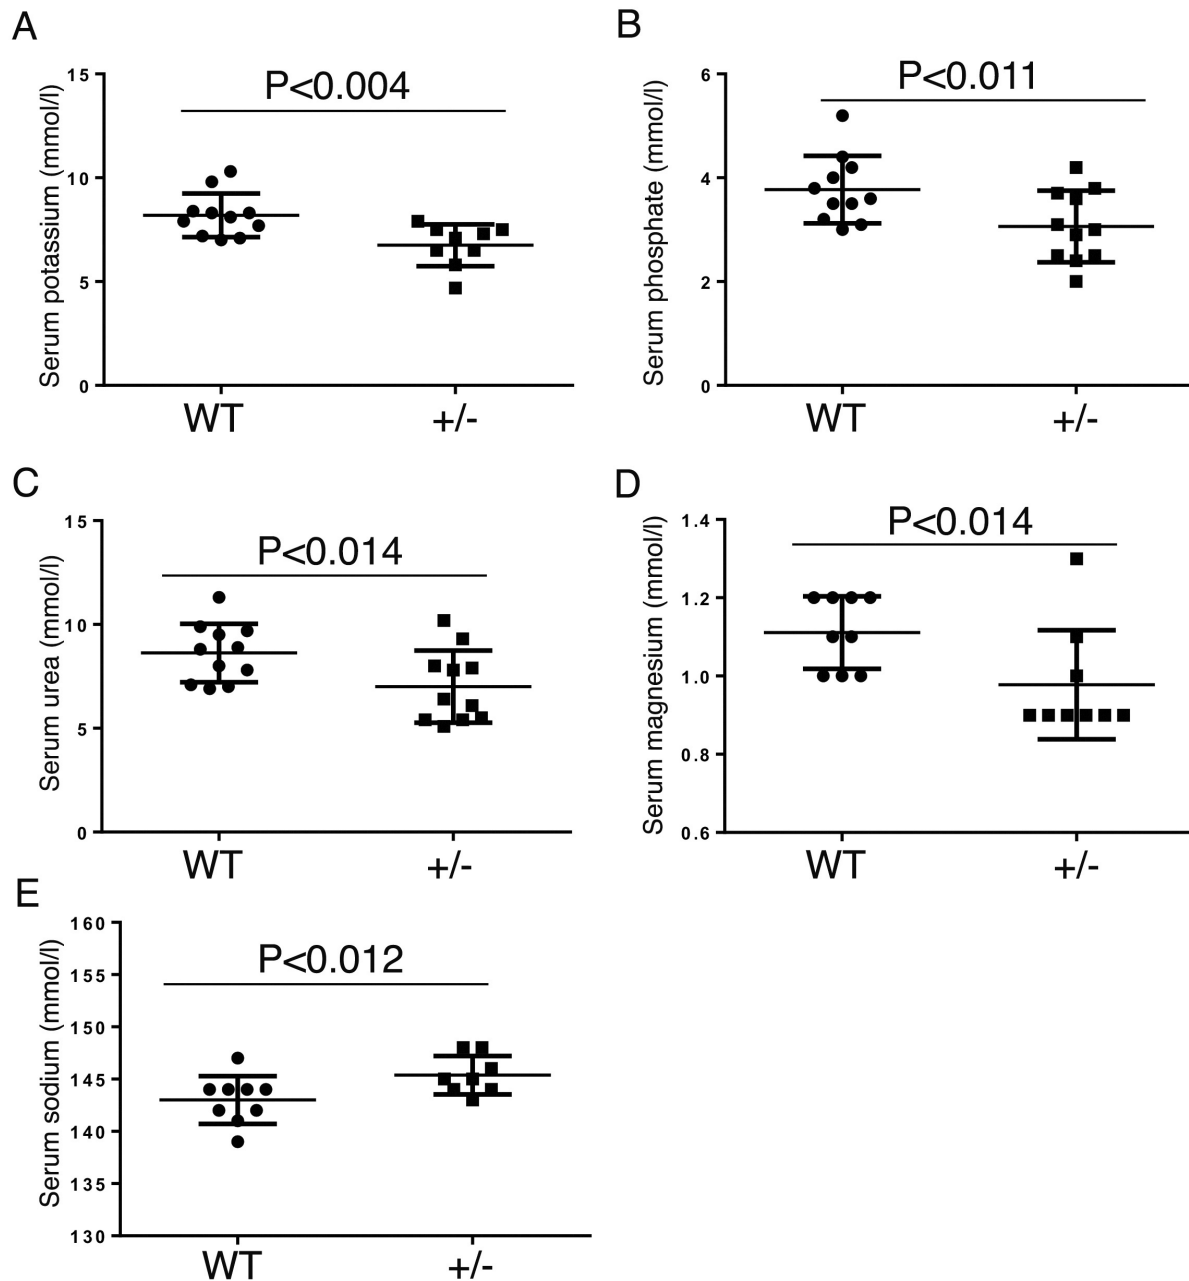

42

43 **Figure 4. Differences in serum biochemical parameters between control and *Tshz3*<sup>lacZ/+</sup>**  
44 **mice.** Plasma concentration of potassium (A), phosphates (B), urea (C), magnesium (D) and  
45 sodium (E). Data are represented as means  $\pm$  SEM. Statistically significant difference from  
46 control at \*p<0.02; \*\*p<0.004. WT, wild type; +/-, *Tshz3*<sup>+/lacZ</sup>

47
